# Supplementary material for: Remarkably improved photocatalytic hydrogen evolution performance of crystalline TiO2 nanobelts hydrogenated at atmospheric pressure with the assistance of hydrogen spillover
Source: Royal Society of Chemistry journal article supplement (doi:10.1039/d2cy01166b), 2022-01-01
Supplement: d2cy01166b1.pdf [file d2cy01166b1.pdf]

Supporting Information

# **Remarkably Improved Photocatalytic Hydrogen Evolution Performance of Crystalline TiO<sub>2</sub> Nanobelts Hydrogenated at Atmospheric Pressure with the Assistance of Hydrogen Spillover**

Longhua Zou,<sup>1,2</sup> Yingming Zhu,<sup>\*2</sup> Zhenpeng Hu,<sup>3</sup> Xingzhong Cao,<sup>4</sup> Wanglai Cen<sup>2</sup>

<sup>1</sup> College of Food and Biological Engineering, Chengdu University, Chengdu 610106, China

<sup>2</sup> Institute of New Energy and Low-Carbon Technology, Sichuan University, Chengdu 610207, China

<sup>3</sup> School of Physics, Nankai University, Tianjin 300071, China.

<sup>4</sup> Institute of High Energy Physics, Chinese Academy of Sciences, Beijing 100049, China.

**Table S1.** the relative concentration of surface Ti-OH and Ti-O-Ti.

|                | Pt-Belt | Pt-Belt-340 | Pt-Belt-500 | Pt-Belt-700 |
|----------------|---------|-------------|-------------|-------------|
| Ti-OH          | 34.9%   | 23.9%       | 29.1%       | 27.0%       |
| Ti-O-Ti        | 65.1%   | 76.1%       | 70.9%       | 73.0%       |
| Ti-OH/ Ti-O-Ti | 0.54    | 0.31        | 0.41        | 0.37        |

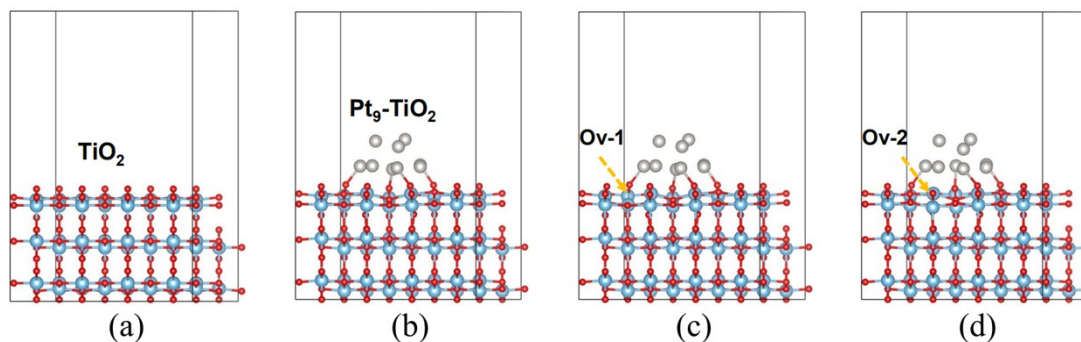

**Fig. S1** Optimized configurations of (a) pristine  $\text{TiO}_2$ ; (b) Pt cluster (9 atoms) loaded  $\text{TiO}_2$ ; (c) and (d) oxygen vacancy containing  $\text{Pt}_9\text{-TiO}_2$ , denoted as Ov-1 and Ov-2. The blue, red and gray balls represent Ti, O and Pt atoms respectively. Oxygen vacancy was marked with yellow arrow.

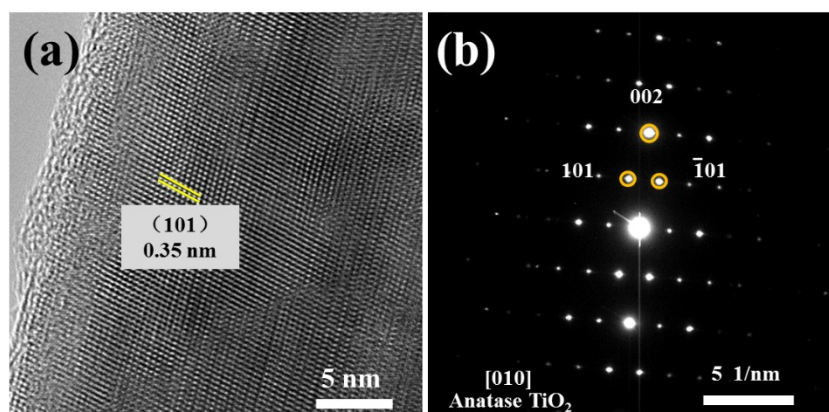

**Fig. S2** The HRTEM image and SAED patterns of pristine  $\text{TiO}_2$  belt.

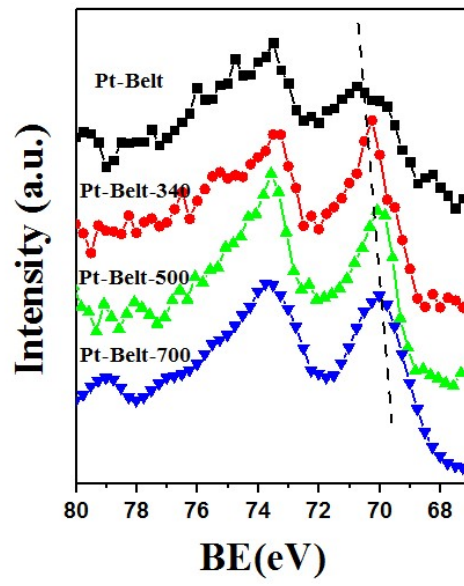

**Fig. S3** Pt *4f* XPS spectra of Pt-Belt and Pt-Belt-x.

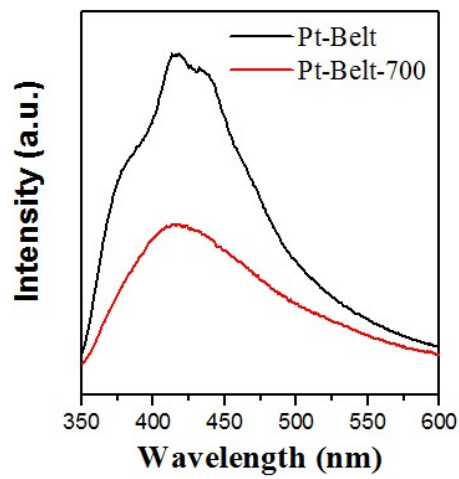

**Fig. S4** Photoluminescence spectra of Pt-belt and Pt-belt-700.
